# Supplementary material
Source: MDPI journal article supplement (https://www.mdpi.com/2073-4395/12/8/1751)
Supplement: s1 [file s1]

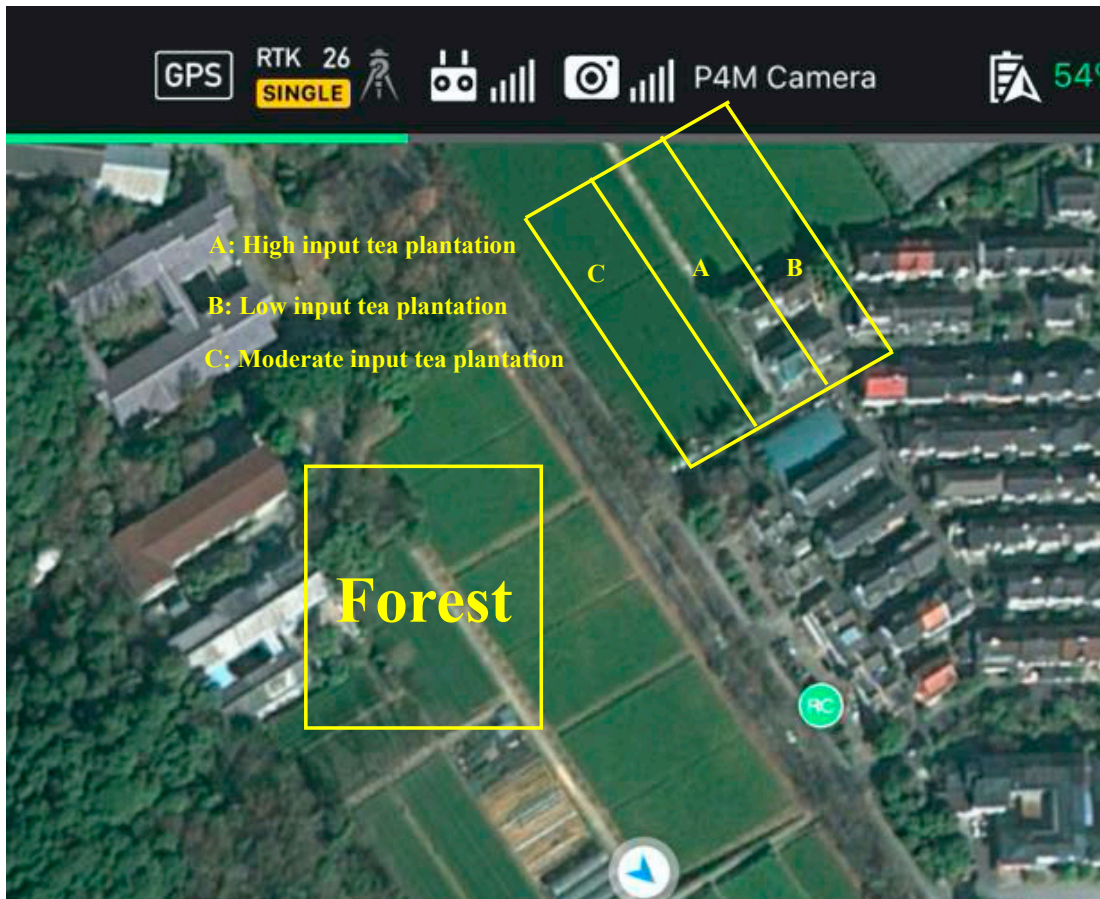

**Figure S1.** The location (120°10'E, 30°10'N) and plot set up for tea gardens with low-, medium-, high-input levels, and the adjacent forest.

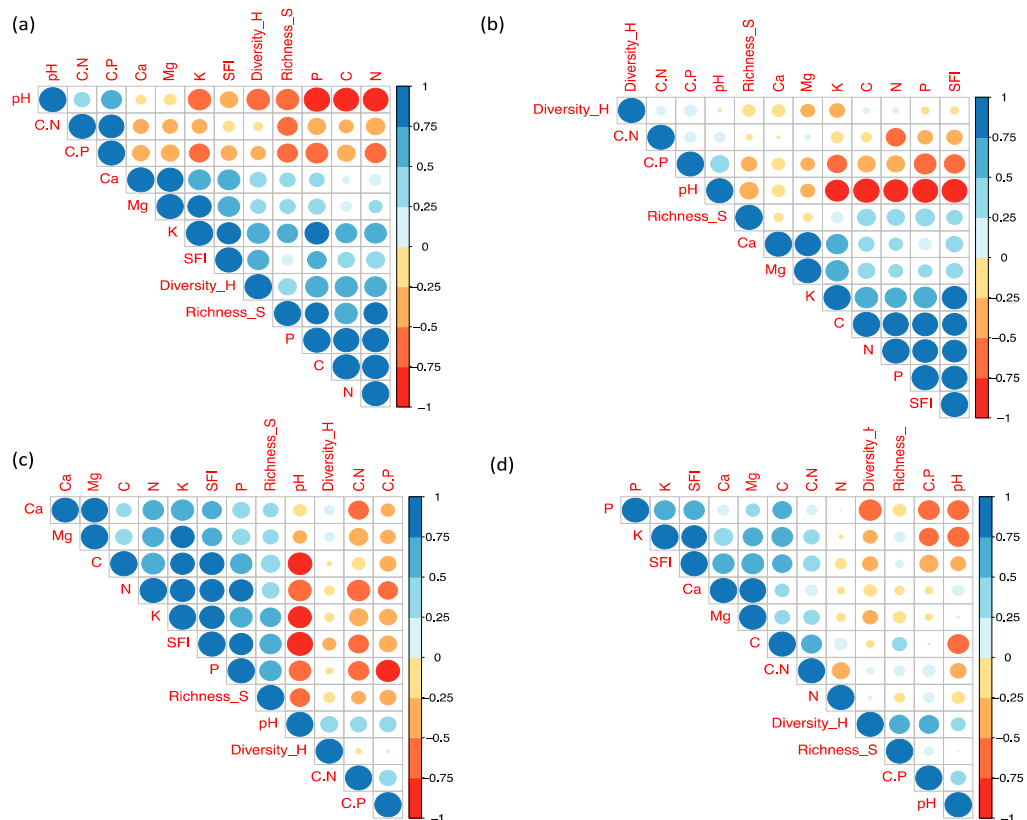

**Figure S2.** Correlations between soil properties and fungal diversity along the tea soil layers (a) 0-10 cm (b) 10-20 cm (c) 20-40 cm (d) 40-60 cm under fertilizer inputs.

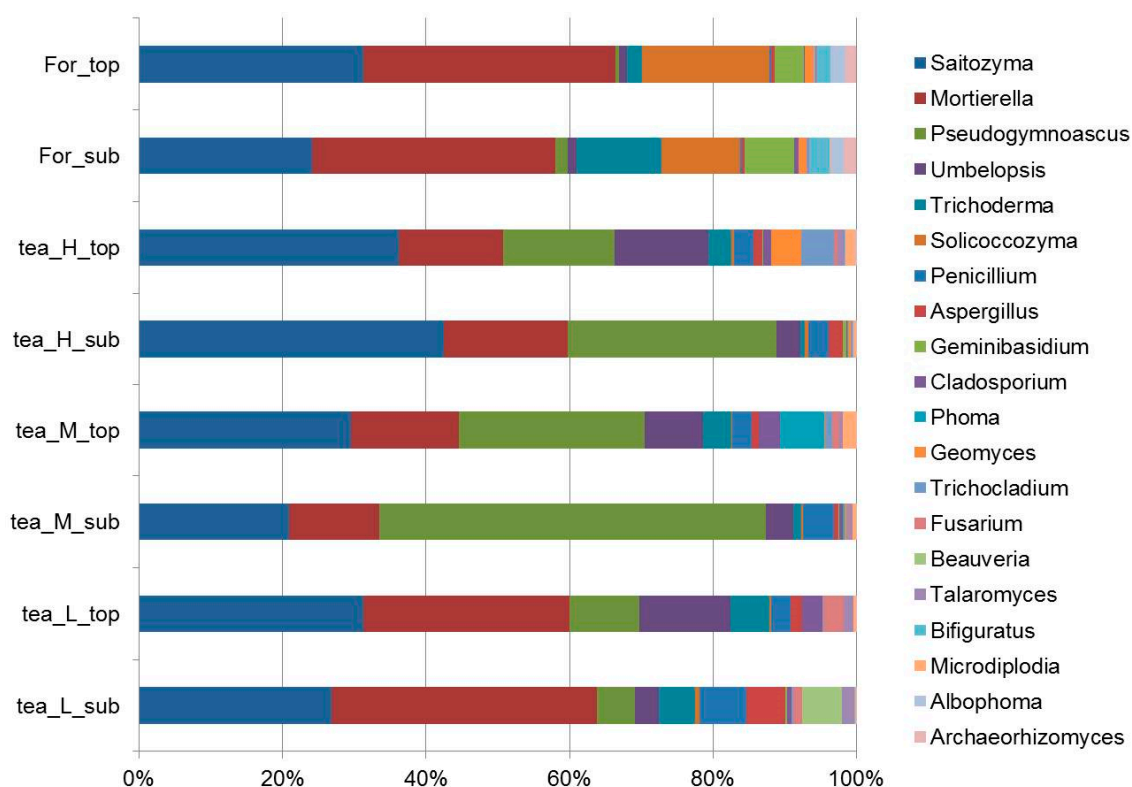

**Figure S3.** The relative abundances of top 20 abundant fungal genus and heatmap analysis of fungal composition. For: forest; L: low fertility tea garden; M: Middle fertility tea garden; H: High fertility tea garden; top: topsoil (0-20 cm); sub: subsoil (20-60 cm).

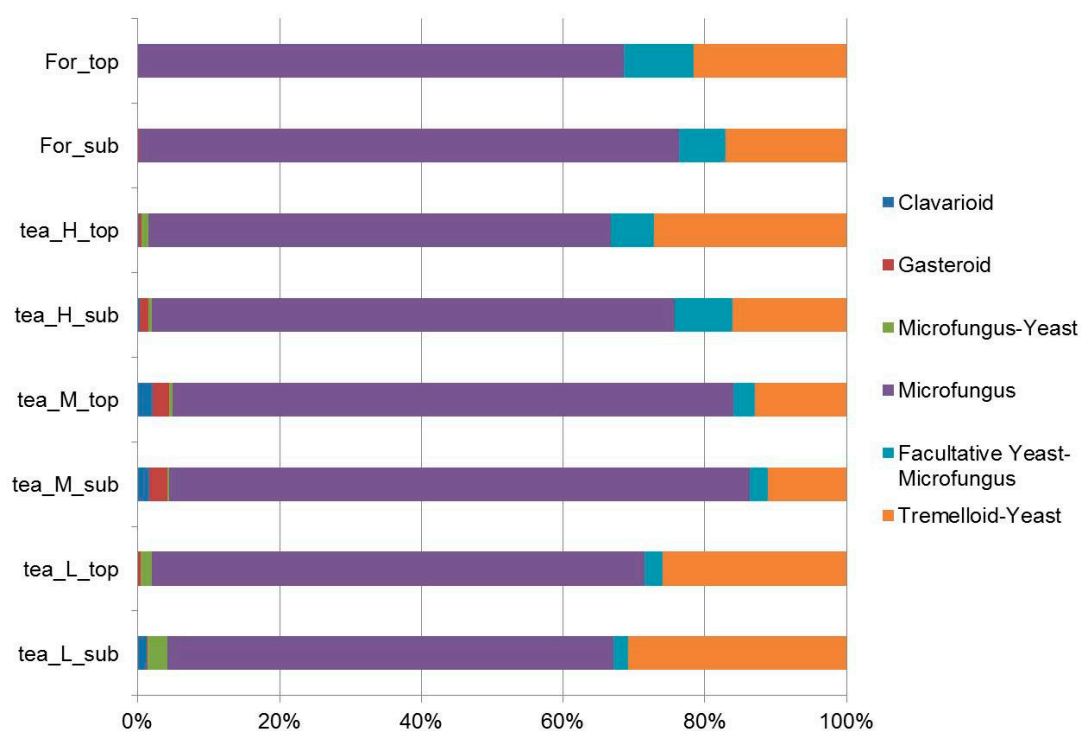

**Figure S4.** fungal traits in tea garden in different soil layers under high, low and middle fertilizer inputs. For: forest; L: low fertility tea garden; M: Middle fertility tea garden; H: High fertility tea garden; top: topsoil (0-20 cm); sub: subsoil (20-60 cm).

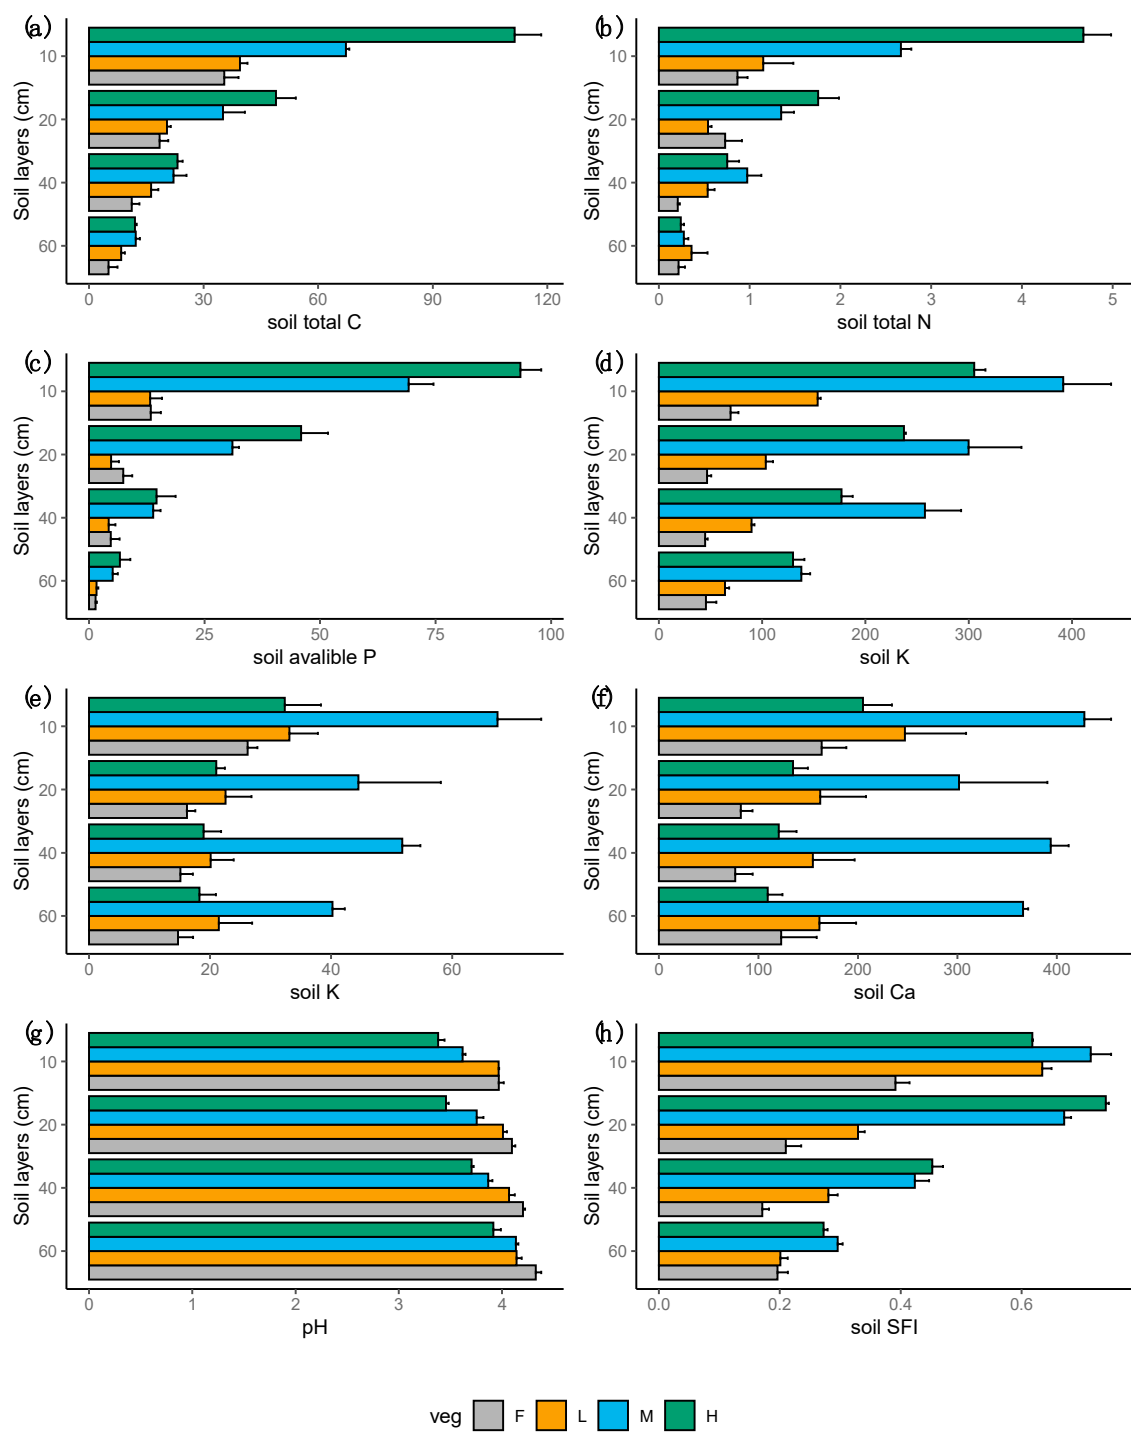

**Figure S5.** Changes of soil properties along soil profiles in studying sites. veg: vegetation types. F: forest; L: low fertility tea garden; M: Middle fertility tea garden; H: High fertility tea garden.

**Table S1.** All physicochemical properties and the soil fertility index of tea gardens and forest in the 0–10, 10–20, 20–40 and 40–60 cm soil depth (mean  $\pm$  standard error).

| Soil depth | Treatment      | pH              | TN (g kg <sup>-1</sup> ) | SOC (g kg <sup>-1</sup> ) | NO <sub>3</sub> <sup>-</sup> (mg kg <sup>-1</sup> ) | NH <sub>4</sub> <sup>+</sup> (mg kg <sup>-1</sup> ) | AP (mg kg <sup>-1</sup> ) | AK (mg kg <sup>-1</sup> ) | SFI               |
|------------|----------------|-----------------|--------------------------|---------------------------|-----------------------------------------------------|-----------------------------------------------------|---------------------------|---------------------------|-------------------|
| 0–10cm     | Forest         | 3.97 $\pm$ 0.10 | 0.86 $\pm$ 0.05          | 22.4 $\pm$ 1.7            | 19.7 $\pm$ 2.6                                      | 16.9 $\pm$ 4.3                                      | 11.1 $\pm$ 1.6            | 69.4 $\pm$ 15.4           | 0.634 $\pm$ 0.031 |
|            | Low-input      | 3.97 $\pm$ 0.01 | 1.40 $\pm$ 0.30          | 22.7 $\pm$ 1.2            | 85.3 $\pm$ 5.6                                      | 19.4 $\pm$ 1.0                                      | 15.8 $\pm$ 1.1            | 153.8 $\pm$ 5.7           | 0.748 $\pm$ 0.001 |
|            | Moderate-input | 3.62 $\pm$ 0.05 | 2.67 $\pm$ 0.22          | 38.6 $\pm$ 1.0            | 380.0 $\pm$ 18.1                                    | 49.1 $\pm$ 2.0                                      | 69.2 $\pm$ 10.8           | 305.2 $\pm$ 21.9          | 0.743 $\pm$ 0.002 |
|            | High-input     | 3.38 $\pm$ 0.12 | 4.68 $\pm$ 0.61          | 64.0 $\pm$ 7.9            | 542.6 $\pm$ 65.6                                    | 56.7 $\pm$ 3.5                                      | 93.4 $\pm$ 9.0            | 341.6 $\pm$ 9.9           | 0.210 $\pm$ 0.050 |
| 10–20cm    | Forest         | 4.10 $\pm$ 0.07 | 0.72 $\pm$ 0.02          | 11.8 $\pm$ 1.4            | 15.0 $\pm$ 2.5                                      | 16.0 $\pm$ 3.7                                      | 7.4 $\pm$ 1.2             | 46.7 $\pm$ 7.7            | 0.329 $\pm$ 0.022 |
|            | Low-input      | 4.01 $\pm$ 0.08 | 0.54 $\pm$ 0.08          | 11.7 $\pm$ 1.1            | 46.6 $\pm$ 2.7                                      | 14.6 $\pm$ 2.7                                      | 9.3 $\pm$ 0.3             | 103.4 $\pm$ 14.3          | 0.671 $\pm$ 0.023 |
|            | Moderate-input | 3.75 $\pm$ 0.14 | 1.19 $\pm$ 0.07          | 20.1 $\pm$ 2.7            | 311.2 $\pm$ 50.9                                    | 39.4 $\pm$ 4.2                                      | 31.1 $\pm$ 2.8            | 237.3 $\pm$ 3.7           | 0.739 $\pm$ 0.010 |
|            | High-input     | 3.46 $\pm$ 0.05 | 1.75 $\pm$ 0.19          | 28.1 $\pm$ 5.9            | 430.0 $\pm$ 71.4                                    | 39.4 $\pm$ 6.0                                      | 45.9 $\pm$ 5.0            | 224.8 $\pm$ 27.3          | 0.171 $\pm$ 0.022 |
| 20–40cm    | Forest         | 4.20 $\pm$ 0.04 | 0.18 $\pm$ 0.03          | 7.4 $\pm$ 0.8             | 15.2 $\pm$ 2.6                                      | 17.3 $\pm$ 3.7                                      | 3.0 $\pm$ 0.5             | 44.8 $\pm$ 4.9            | 0.280 $\pm$ 0.031 |
|            | Low-input      | 4.07 $\pm$ 0.11 | 0.56 $\pm$ 0.13          | 9.4 $\pm$ 2.1             | 38.4 $\pm$ 3.3                                      | 12.1 $\pm$ 1.8                                      | 7.8 $\pm$ 0.6             | 89.8 $\pm$ 5.6            | 0.423 $\pm$ 0.047 |
|            | Moderate-input | 3.87 $\pm$ 0.08 | 0.72 $\pm$ 0.07          | 13.9 $\pm$ 2.0            | 207.5 $\pm$ 20.4                                    | 26.2 $\pm$ 5.3                                      | 12.4 $\pm$ 0.6            | 176.8 $\pm$ 21.6          | 0.452 $\pm$ 0.036 |
|            | High-input     | 3.71 $\pm$ 0.04 | 0.85 $\pm$ 0.06          | 13.3 $\pm$ 1.5            | 281.3 $\pm$ 14.4                                    | 28.5 $\pm$ 2.2                                      | 19.1 $\pm$ 1.5            | 232.5 $\pm$ 28.8          | 0.196 $\pm$ 0.034 |
| 40–60cm    | Forest         | 4.33 $\pm$ 0.10 | 0.16 $\pm$ 0.02          | 3.7 $\pm$ 0.5             | 16.2 $\pm$ 2.5                                      | 10.1 $\pm$ 2.7                                      | 1.0 $\pm$ 0.1             | 33.2 $\pm$ 4.0            | 0.201 $\pm$ 0.024 |
|            | Low-input      | 4.14 $\pm$ 0.10 | 0.20 $\pm$ 0.03          | 4.8 $\pm$ 1.1             | 34.3 $\pm$ 3.2                                      | 9.5 $\pm$ 1.1                                       | 1.6 $\pm$ 0.1             | 64.0 $\pm$ 8.1            | 0.296 $\pm$ 0.016 |
|            | Moderate-input | 4.13 $\pm$ 0.05 | 0.27 $\pm$ 0.03          | 6.5 $\pm$ 0.3             | 90.6 $\pm$ 6.5                                      | 16.2 $\pm$ 2.0                                      | 5.1 $\pm$ 0.8             | 129.9 $\pm$ 21.8          | 0.273 $\pm$ 0.013 |
|            | High-input     | 3.92 $\pm$ 0.15 | 0.28 $\pm$ 0.05          | 6.9 $\pm$ 0.5             | 269.9 $\pm$ 41.1                                    | 27.7 $\pm$ 4.4                                      | 9.7 $\pm$ 1.8             | 138.0 $\pm$ 17.1          | 0.634 $\pm$ 0.031 |

TN, total nitrogen; SOC, soil organic carbon; NO<sub>3</sub><sup>-</sup>, nitrate; NH<sub>4</sub><sup>+</sup>, ammonium; AP, available Phosphorus; AK, available potassium; SFI, soil fertility index.
